# Supplementary material for: High performance and high stability low temperature aqueous solution-derived Li–Zr co-doped ZnO thin film transistors
Source: Royal Society of Chemistry journal article supplement (doi:10.1039/c2jm15526e), 2012-01-01
Supplement: c2jm15526e.pdf [file c2jm15526e.pdf]

## Electronic Supplementary Information

### High performance and High Stability Low temperature Aqueous Solution-Derived Li-Zr Co-doped ZnO TFTs

By Yangho Jung<sup>1,2</sup>, Wooseok Yang<sup>1</sup>, Chang Young Koo<sup>1,3</sup>, Keunkyu Song<sup>1,2</sup>,  
and Jooho Moon<sup>1\*</sup>

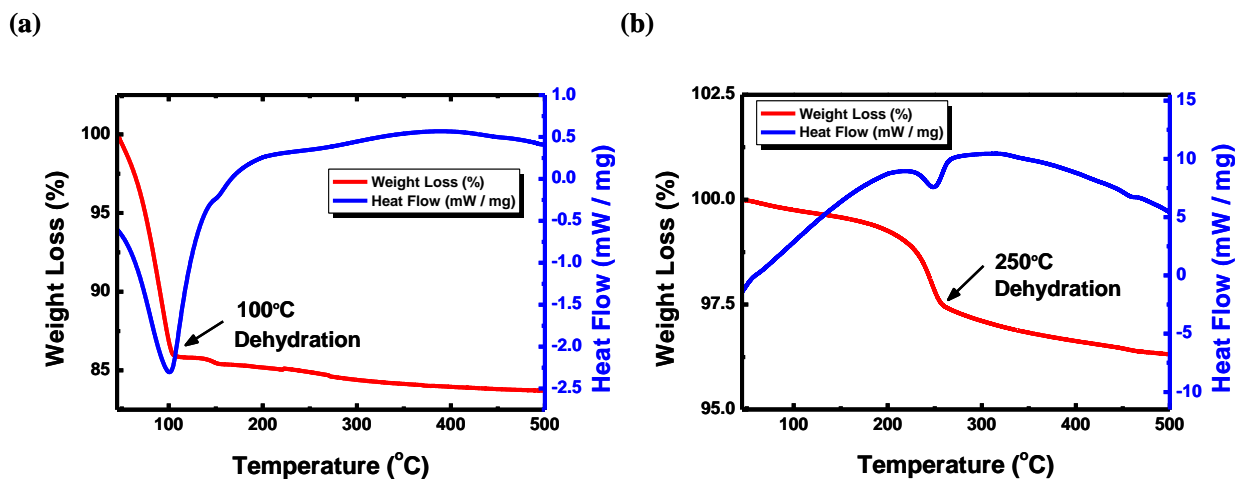

**Figure S1.** Thermogravimetric analysis (TGA) and differential scanning calorimetry (DSC) curves of used (a) Zn(OH)<sub>2</sub> and (b) Zr(OH)<sub>4</sub> precursor powder under air at a heating rate 5 °C/min.

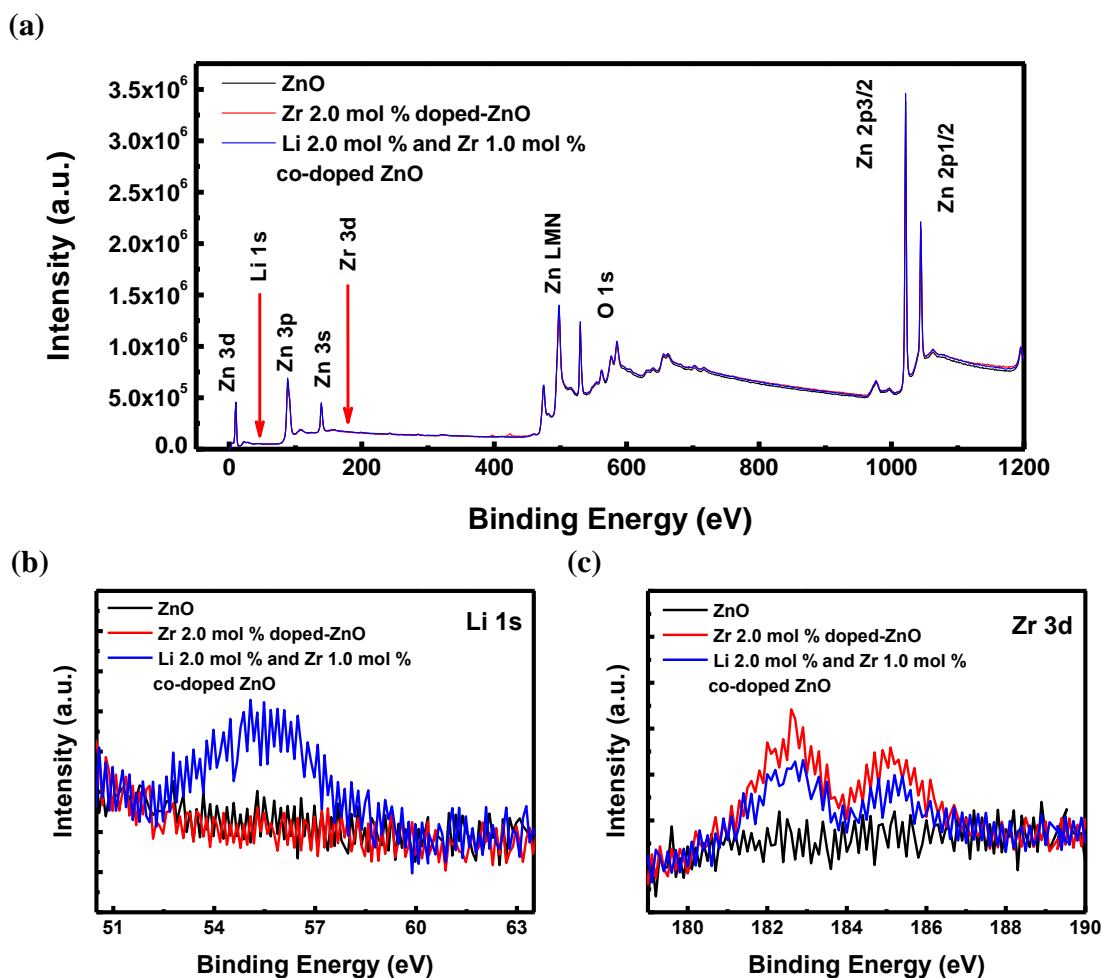

**Figure S2.** (a) Broad XPS scan spectra of ZnO, Zr 2.0 mol % doped-ZnO (2.0 mol % ZZO) and Li 2.0 mol %-Zr 1.0 mol % co-doped ZnO (2.0 mol % LZZO) thin films. The magnified XPS showing (b) Li 1s, (c) Zr 3d spectrum of ZnO, 2.0 mol % ZZO and 2.0 mol % LZZO thin film. The Zn 2p<sub>3/2</sub> and Zn 2p<sub>1/2</sub> binding energies of ZZO (Zr 2.0 mol % doped) and LZZO (Li 2.0 mol %-Zr 1.0 mol co-doped) are 1021.9 eV and 1044.9 eV, respectively. The peaks at 530 eV, 55.7 eV and 182.7 eV correspond to the binding energies of O1s, Li 1s and Zr 3d, respectively.

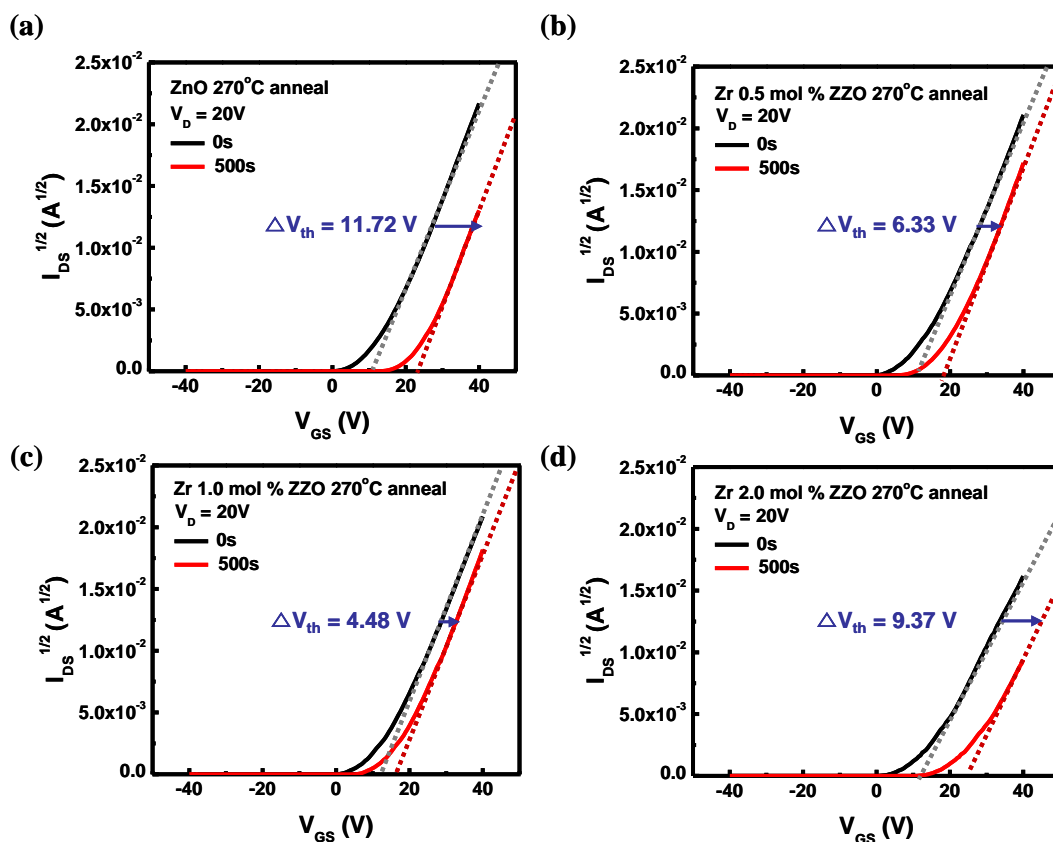

| Zr doping content | Mobility ( $\text{cm}^2\text{V}^{-1}\text{s}^{-1}$ ) | Threshold voltage (V) | $\Delta V_{th}$ (V) | Subthreshold value ( $\text{V dec}^{-1}$ ) | On/off current ratio |
|-------------------|------------------------------------------------------|-----------------------|---------------------|--------------------------------------------|----------------------|
| ZnO               | 1.59                                                 | 6.97                  | 12.72               | 1.19                                       | $7.22 \times 10^7$   |
| Zr 0.5 mol % ZZO  | 1.52                                                 | 6.23                  | 6.33                | 0.98                                       | $3.46 \times 10^7$   |
| Zr 1.0 mol % ZZO  | 1.47                                                 | 6.82                  | 4.48                | 0.92                                       | $3.39 \times 10^7$   |
| Zr 2.0 mol % ZZO  | 1.07                                                 | 7.63                  | 9.37                | 1.07                                       | $2.74 \times 10^7$   |

**Figure S3.**  $I_D^{1/2}$  vs.  $V_{GS}$  plots used to extract mobility,  $V_{th}$ ,  $\Delta V_{th}$ , SS value and on/off current ratio of solution-processed ZnO and Zr-doped ZnO TFTs annealed at 270 °C as a function of Zr contents after applying electrical stress with a gate bias of 20 V for 500 s (the line is a guide to the eye).

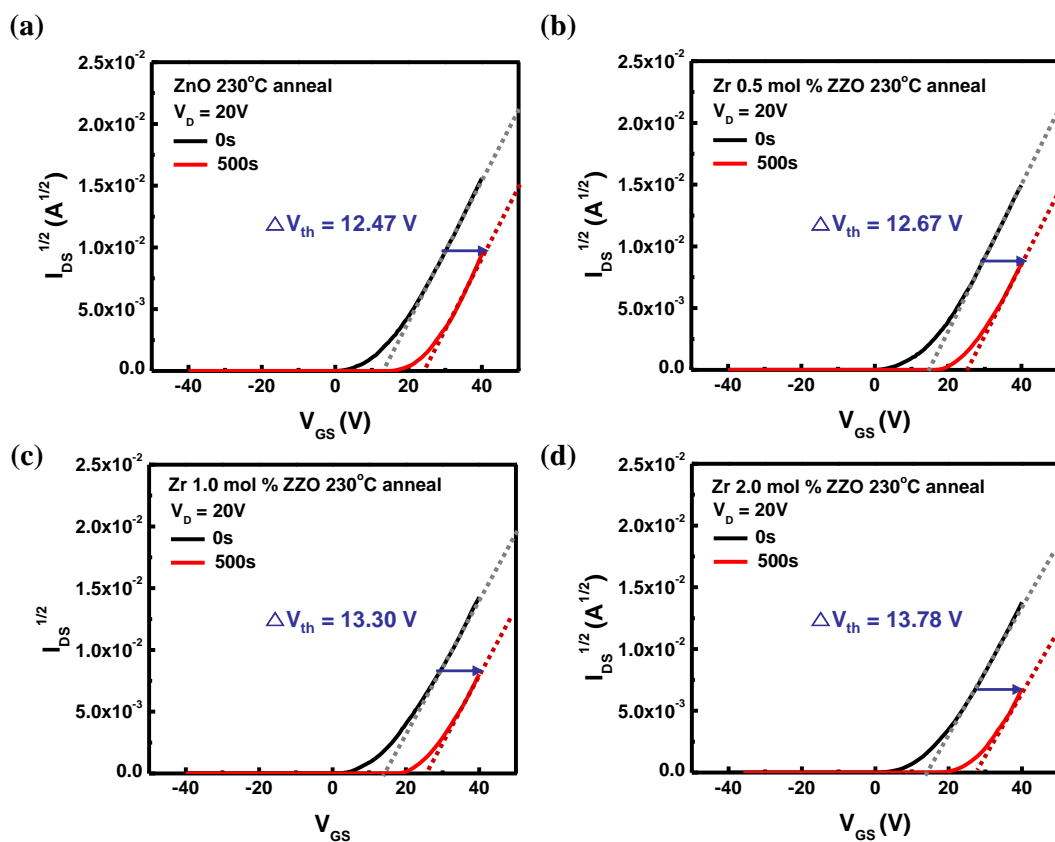

| Zr doping content | Mobility / $\text{cm}^2\text{V}^{-1}\text{s}^{-1}$ | Threshold voltage / V | $\Delta V_{th}$ / V | Subthreshold value / $\text{V dec}^{-1}$ | On/off current ratio |
|-------------------|----------------------------------------------------|-----------------------|---------------------|------------------------------------------|----------------------|
| ZnO               | 0.93                                               | 7.80                  | 12.47               | 1.27                                     | $2.23 \times 10^7$   |
| Zr 0.5 mol % ZZO  | 0.92                                               | 8.21                  | 12.67               | 1.14                                     | $2.75 \times 10^7$   |
| Zr 1.0 mol % ZZO  | 0.87                                               | 8.44                  | 13.30               | 1.09                                     | $1.79 \times 10^7$   |
| Zr 2.0 mol % ZZO  | 0.82                                               | 8.97                  | 13.78               | 1.23                                     | $2.72 \times 10^7$   |

**Figure S4.**  $I_D^{1/2}$  vs.  $V_{GS}$  plots used to extract mobility,  $V_{th}$ ,  $\Delta V_{th}$ , SS value and on/off current ratio of solution-processed ZnO and Zr-doped ZnO TFTs annealed at 220 °C as a function of Zr contents after applying electrical stress with a gate bias of 20 V for 500 s (the line is a guide to the eye).

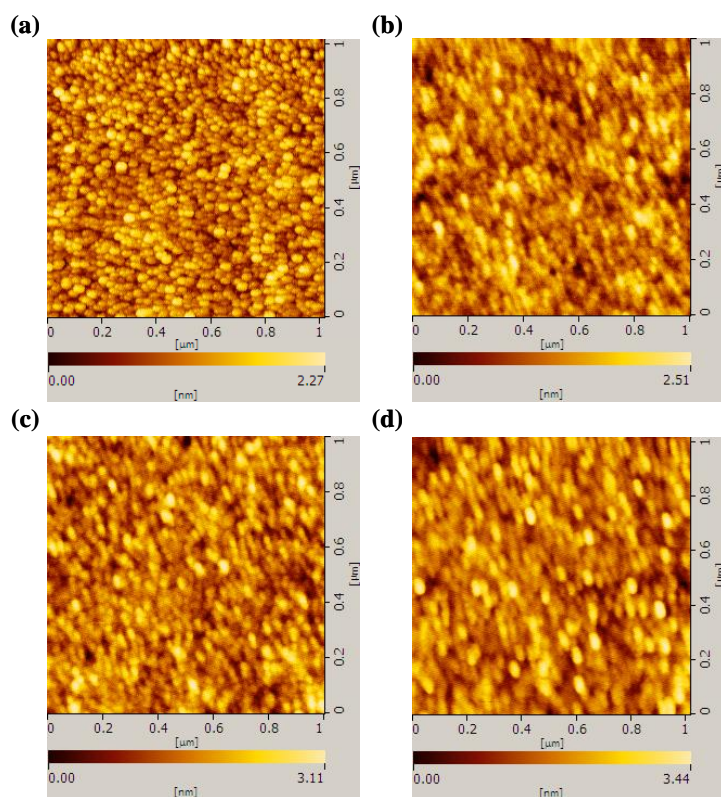

**Figure S5.** Representative two-dimensional AFM height images of (a) 0.0 mol % (b) 0.5 mol % (c) 1.0 mol % (d) 2.0 mol % Li doping in 1.0 mol % ZZO films.

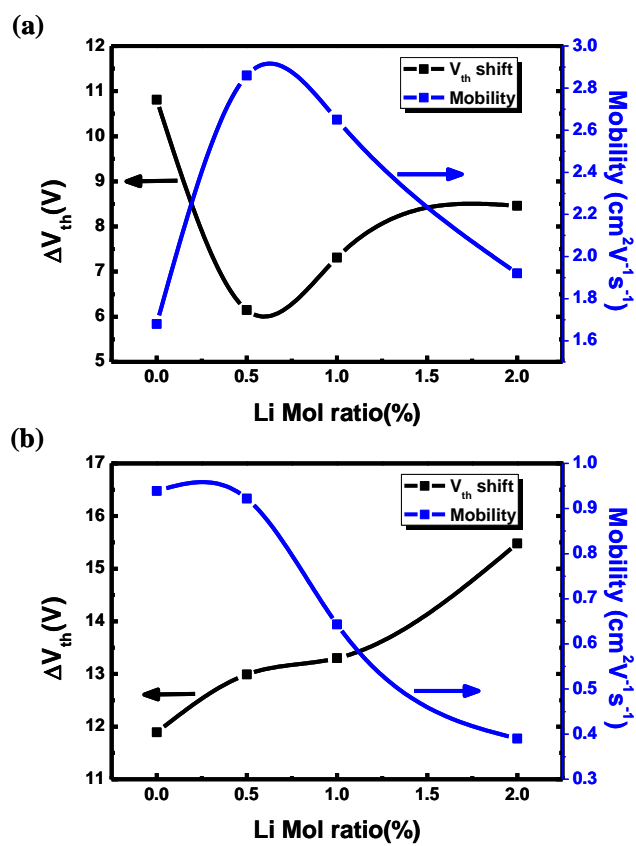

**Figure S6.** Variations in mobility and  $\Delta V_{th}$  of solution-processed ZnO TFTs and Li-doped ZZO TFTs annealed at (a) 270 °C and (b) 220 °C as a function of Li contents.
